# Supplementary material
Source: Springer Nature journal article supplement (https://www.springermedizin.de/resource/supplementary/12885_2012_4027_MOESM10_ESM.pdf/9465002)

# Unstained Whole Mount

## A

Ex 860; non-GFP mouse

Ex 860; GFP mouse

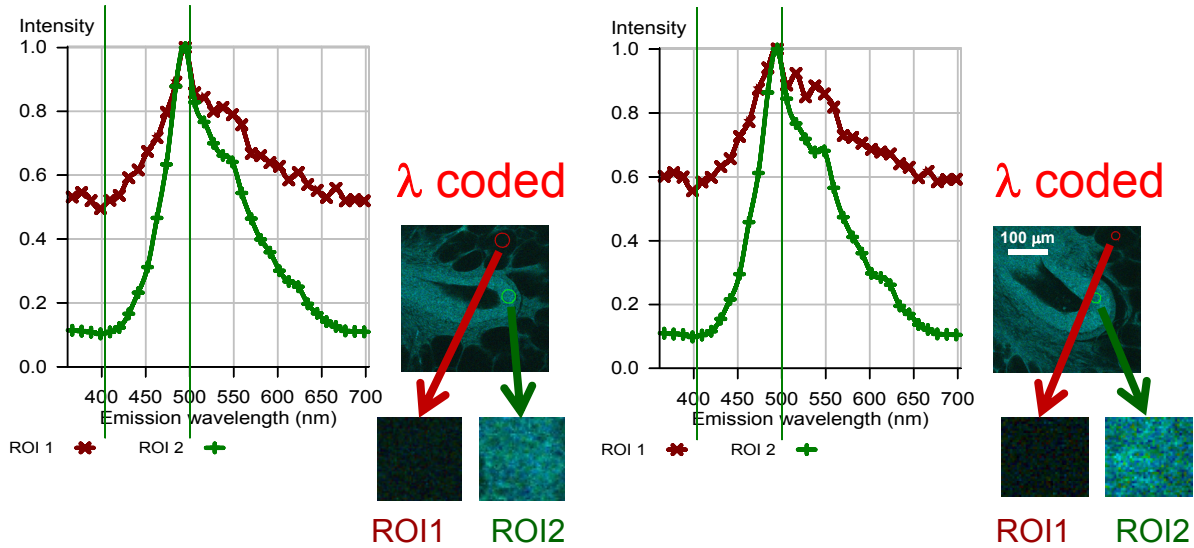

## B

GFP-mouse

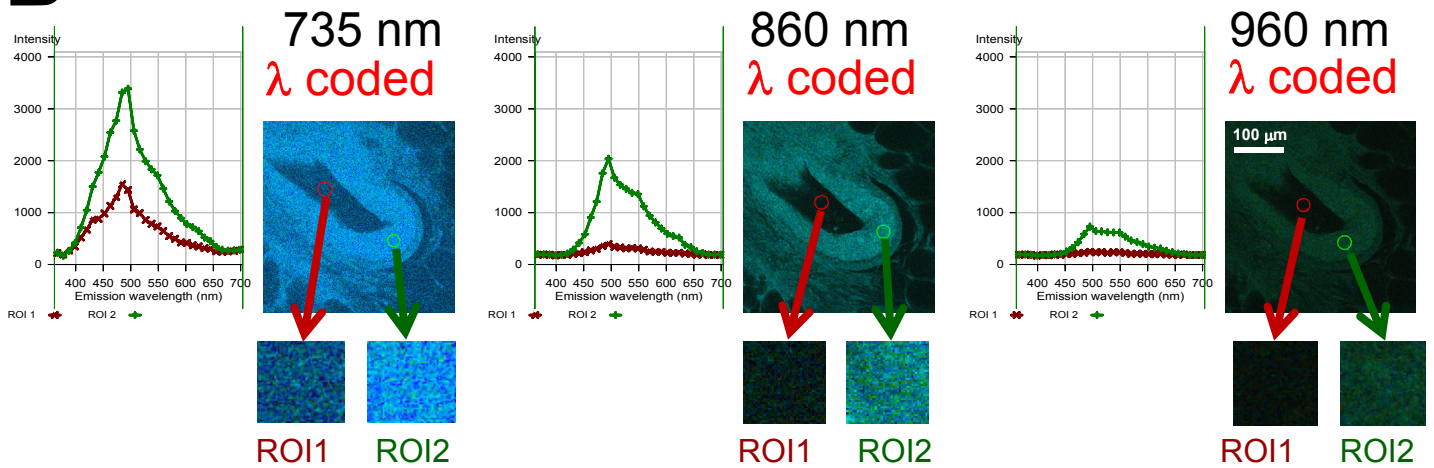

Supplement: MOESM10 [file 9465002]
